# Supplementary material for: Measurement of FGFR3 signaling at the cell membrane via total internal reflection fluorescence microscopy to compare the activation of FGFR3 mutants
Source: PubMed Central journal article supplement (PMC9900515; doi:10.1016/j.jbc.2022.102832), 2022-12-27

**a**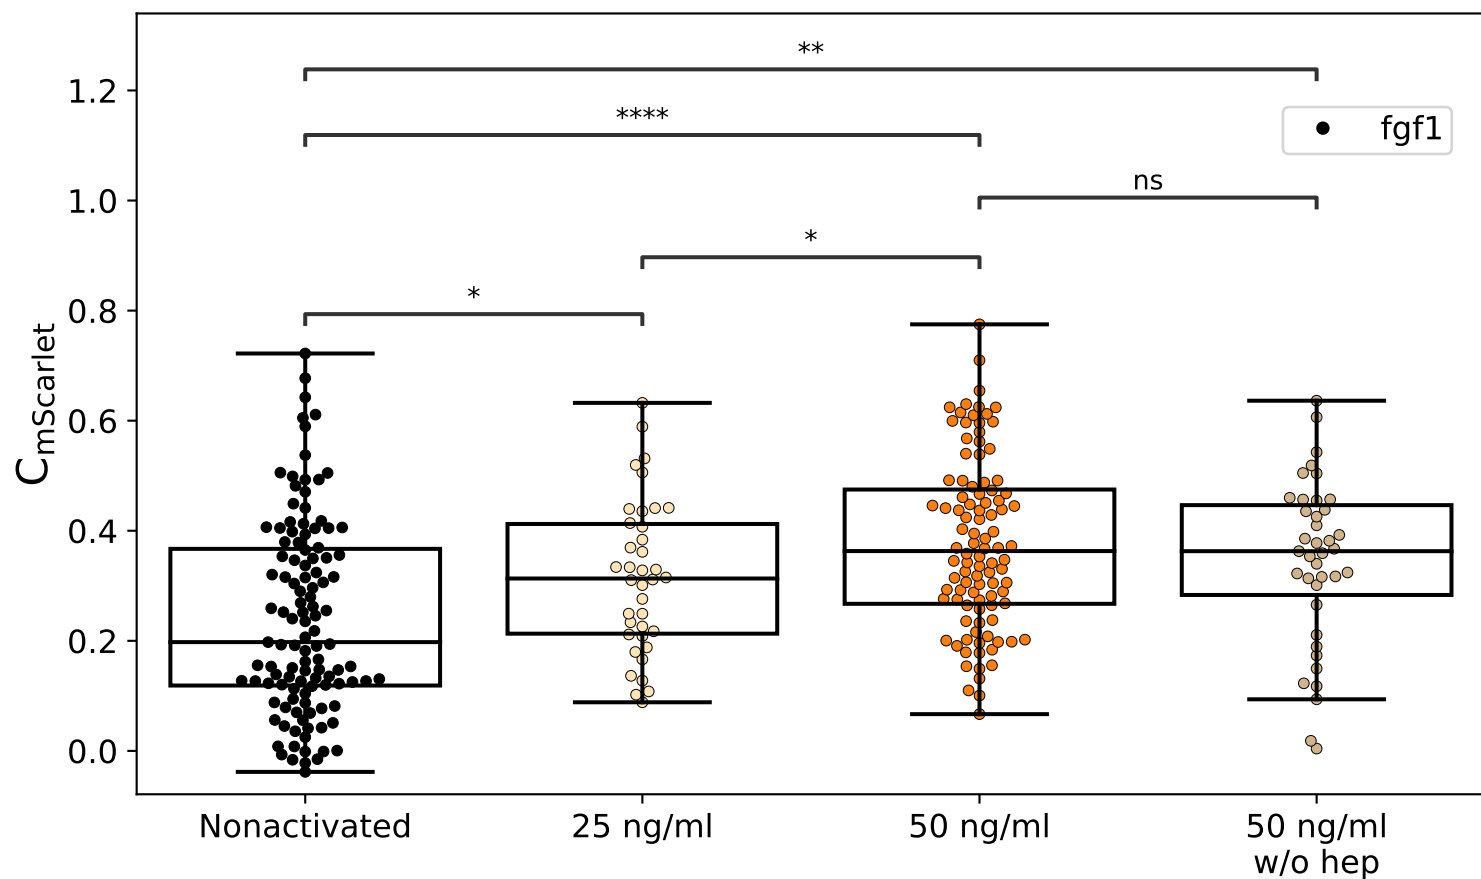**b**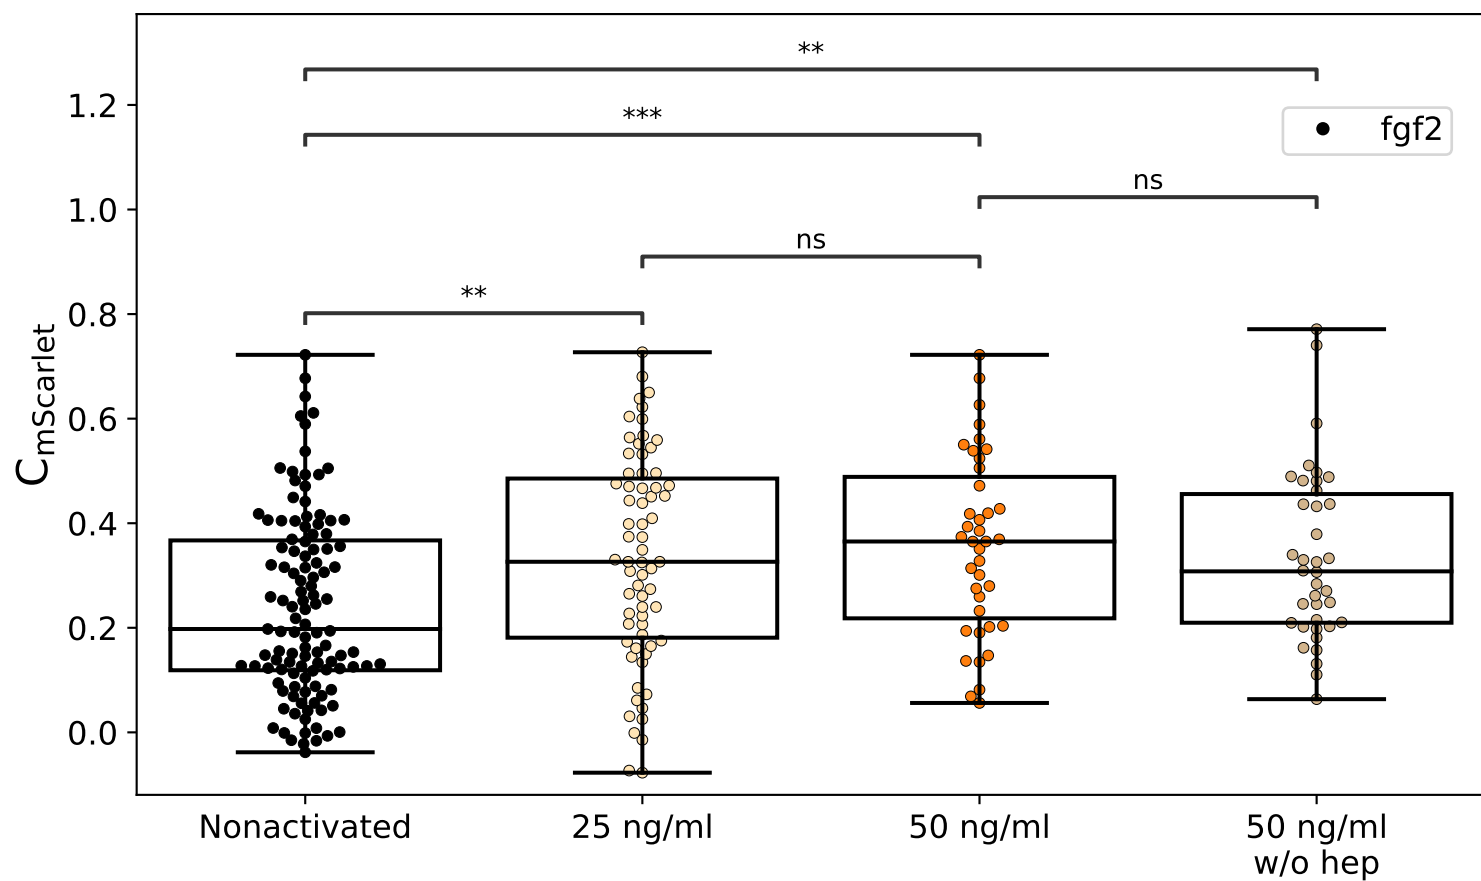

Supplement: mmc12.pdf [file mmc12.pdf]
